# Supplementary material for: A drastic improvement in photocatalytic H2 production by TiO2 nanosheets grown directly on Ta2O5 substrates
Source: Royal Society of Chemistry journal article supplement (doi:10.1039/d1nr02413b), 2021-01-01
Supplement: d1nr02413b1.pdf [file d1nr02413b1.pdf]

## Electronic Supplementary Information

### A drastic improvement in photocatalytic H<sub>2</sub> production by TiO<sub>2</sub> nanosheets grown directly on Ta<sub>2</sub>O<sub>5</sub> substrates

Benedict Osuagwu<sup>a</sup>, Waseem Raza<sup>a,c</sup>, Alexander B. Tesler<sup>a</sup> and Patrik Schmuki<sup>a,b,c,\*</sup>

<sup>a</sup>Department of Materials Science and Engineering, WW4-LKO, University of Erlangen-Nuremberg, Martensstrasse 7, 91058 Erlangen, Germany

<sup>b</sup>Chemistry Department, King Abdulaziz University, 80203 Jeddah, Saudi Arabia Kingdom

<sup>c</sup>Regional Centre of Advanced Technologies and Materials, Palacky University, Listopadu 50A, 772 07 Olomouc, Czech Republic

---

**Fig. S1.** (a, c) Top-view FE-SEM images of Ta<sub>2</sub>O<sub>5</sub>/TiO<sub>2</sub> NS (1- $\mu$ m-thick), (b, d) Ta<sub>2</sub>O<sub>5</sub>/TiO<sub>2</sub> NS (2.5- $\mu$ m-thick), insert SEM images shows sheet thickness of Ta<sub>2</sub>O<sub>5</sub>/TiO<sub>2</sub> NS (1- $\mu$ m-thick) (c), and Ta<sub>2</sub>O<sub>5</sub>/TiO<sub>2</sub> NS (2.5- $\mu$ m-thick) (d).

**Fig. S2** Wide survey XPS spectra of the as-formed and annealed (2- $\mu$ m-thick) TiO<sub>2</sub> NSs on Ta<sub>2</sub>O<sub>5</sub> and FTO substrates.

**Fig. S3** The optical direct (Ta<sub>2</sub>O<sub>5</sub>) and indirect (TiO<sub>2</sub>) band gaps calculated from diffuse reflectance measurements using the Tauc plot for annealed (a) Ta/Ta<sub>2</sub>O<sub>5</sub> and (b) 2- $\mu$ m-thick FTO/TiO<sub>2</sub> NSs.

**Fig. S4** Still digital and corresponding HR-SEM images of (a) as-formed and (b) after 24 h of H<sub>2</sub> production by Ta<sub>2</sub>O<sub>5</sub>/TiO<sub>2</sub> NS (2- $\mu$ m-thick) sample. (c) XRD spectra of the annealed TiO<sub>2</sub> NS arrays (2- $\mu$ m-thick) prepared on Ta<sub>2</sub>O<sub>5</sub> before and after 24 h H<sub>2</sub> production process.

**Table S1.** Layer thickness, average sheet thickness, average sheet width, and percentage of {001} facets of annealed TiO<sub>2</sub> NS arrays with varying thicknesses on FTO and Ta<sub>2</sub>O<sub>5</sub> substrates.

\*Corresponding author: Prof. Dr. Patrik Schmuki

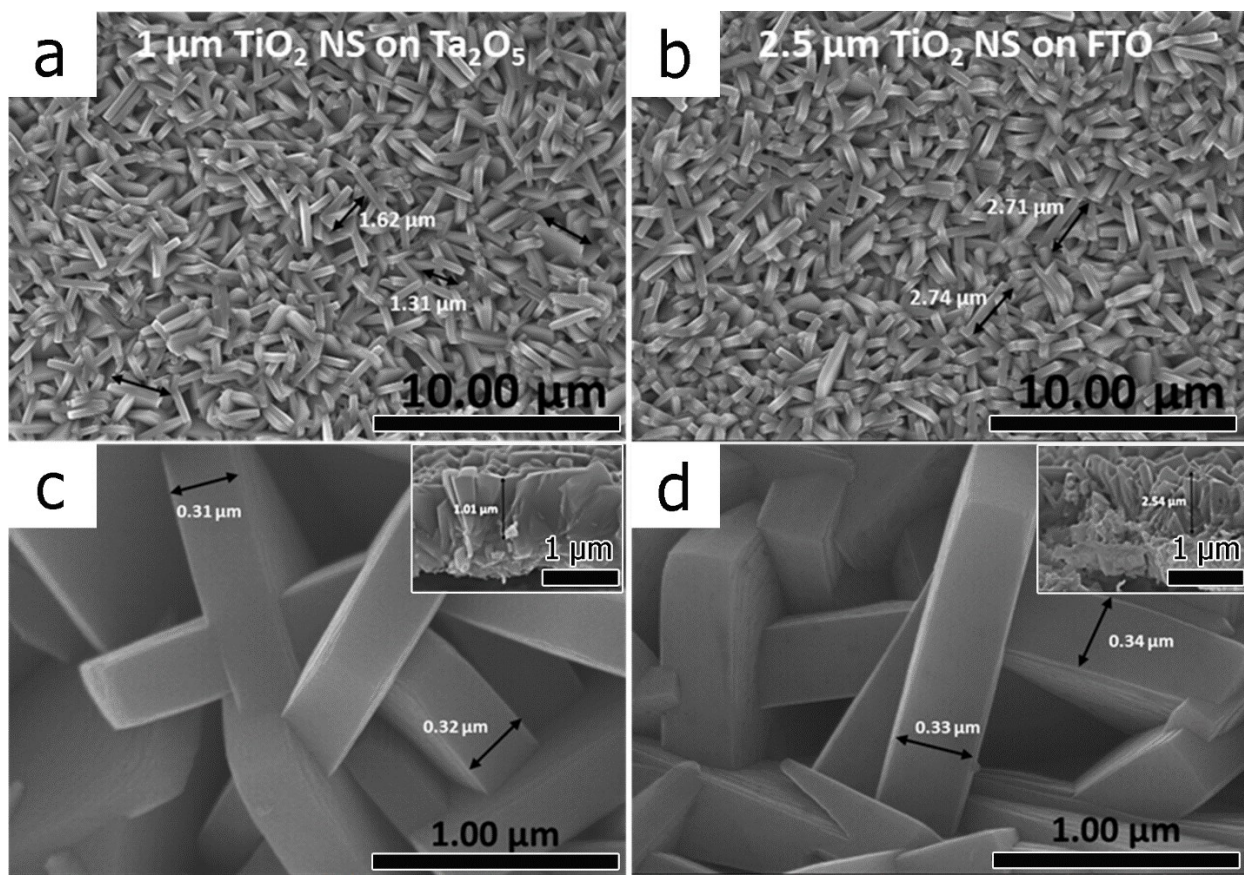

**Fig. S1.** (a, c) Top-view FE-SEM images of Ta<sub>2</sub>O<sub>5</sub>/TiO<sub>2</sub> NS (1- $\mu$ m-thick), (b, d) Ta<sub>2</sub>O<sub>5</sub>/TiO<sub>2</sub> NS (2.5- $\mu$ m-thick), insert SEM images shows sheet thickness of Ta<sub>2</sub>O<sub>5</sub>/TiO<sub>2</sub> NS (1- $\mu$ m-thick) (c), and Ta<sub>2</sub>O<sub>5</sub>/TiO<sub>2</sub> NS (2.5- $\mu$ m-thick) (d).

**Table S1.** Layer thickness, average sheet thickness, average sheet width, and percentage of {001} facets of annealed TiO<sub>2</sub> NS arrays with varying thicknesses on FTO and Ta<sub>2</sub>O<sub>5</sub> substrates.

| Sample                                                                   | Layer thickness ( $\mu$ m) | Average sheet thickness ( $\mu$ m) | Average sheet width ( $\mu$ m) | Percent {001} (%) |
|--------------------------------------------------------------------------|----------------------------|------------------------------------|--------------------------------|-------------------|
| FTO/TiO <sub>2</sub> NS (2- $\mu$ m-thick)                               | 2.02                       | 0.335                              | 2.245                          | 73.95             |
| Ta <sub>2</sub> O <sub>5</sub> /TiO <sub>2</sub> NS (1- $\mu$ m-thick)   | 1.01                       | 0.315                              | 1.465                          | 65.37             |
| Ta <sub>2</sub> O <sub>5</sub> /TiO <sub>2</sub> NS (2- $\mu$ m-thick)   | 2.04                       | 0.340                              | 2.250                          | 73.68             |
| Ta <sub>2</sub> O <sub>5</sub> /TiO <sub>2</sub> NS (2.5- $\mu$ m-thick) | 2.54                       | 0.335                              | 2.725                          | 77.80             |

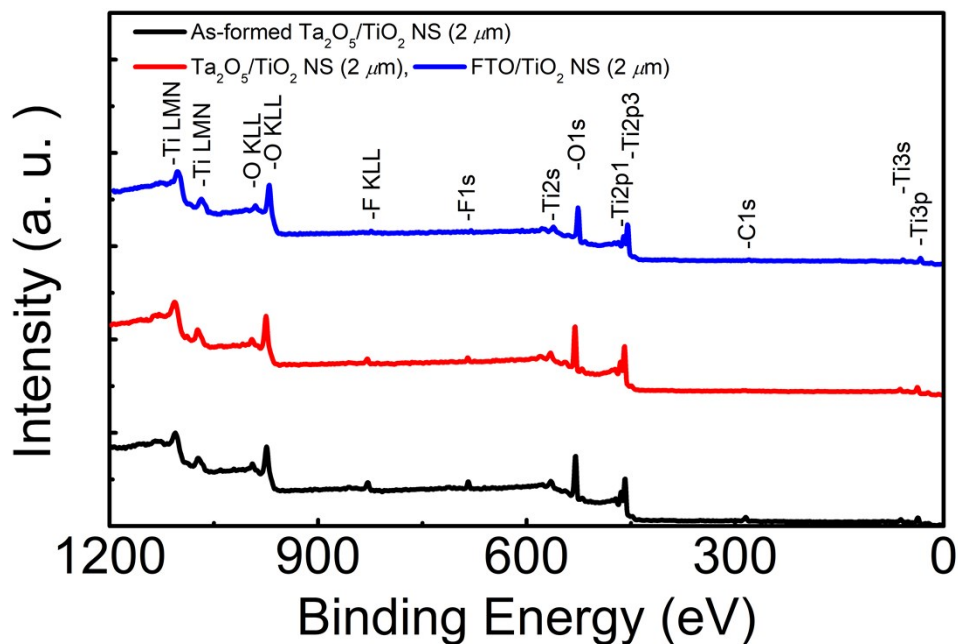

**Fig. S2** Wide survey XPS spectra of the as-formed and annealed (2- $\mu\text{m}$ -thick)  $\text{TiO}_2$  NSs on  $\text{Ta}_2\text{O}_5$  and FTO substrates.

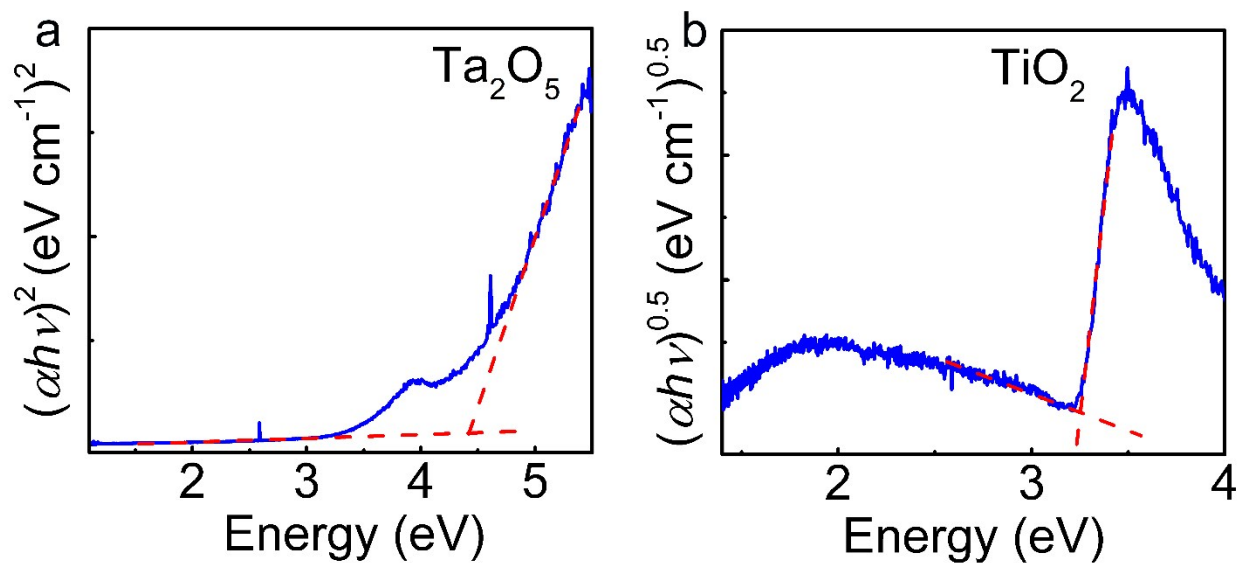

**Fig. S3** The optical direct ( $\text{Ta}_2\text{O}_5$ ) and indirect ( $\text{TiO}_2$ ) band gaps calculated from diffuse reflectance measurements using the Tauc plot for the annealed (a)  $\text{Ta}/\text{Ta}_2\text{O}_5$  and (b) 2- $\mu\text{m}$ -thick  $\text{FTO}/\text{TiO}_2$  NSs.

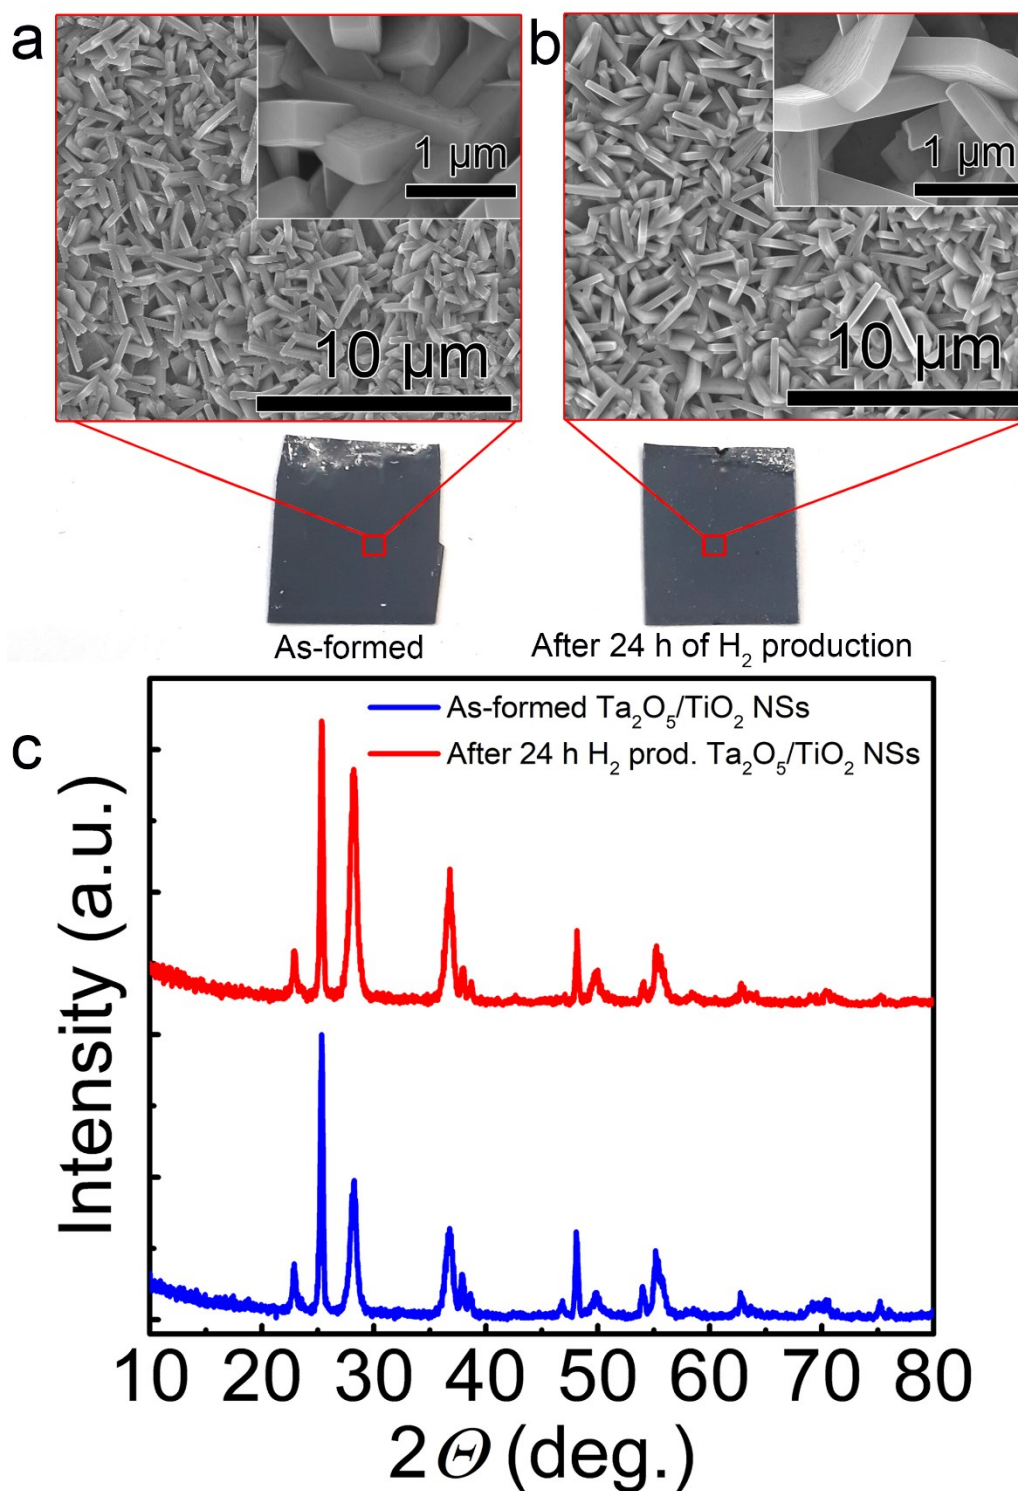

**Fig. S4** Still digital and corresponding HR-SEM images of (a) as-formed and (b) after 24 h of H<sub>2</sub> production by Ta<sub>2</sub>O<sub>5</sub>/TiO<sub>2</sub> NS (2-μm-thick) sample. (c) XRD spectra of the annealed TiO<sub>2</sub> NS arrays (2-μm-thick) prepared on Ta<sub>2</sub>O<sub>5</sub> before and after 24 h H<sub>2</sub> production process.
